# Supplementary material
Source: PubMed Central journal article supplement (PMC10880453)
Supplement: NIHMS1963602-supplement-Appendix.pdf [file NIHMS1963602-supplement-Appendix.pdf]

# THE LANCET

## Respiratory Medicine

### Supplementary appendix

This appendix formed part of the original submission and has been peer reviewed. We post it as supplied by the authors.

Supplement to: Kneyber MCJ, Khemani RG, Bhalla A, et al. Understanding clinical and biological heterogeneity to advance precision medicine in paediatric acute respiratory distress syndrome. *Lancet Respir Med* 2022; published online Dec 22. [https://doi.org/10.1016/S2213-2600\(22\)00483-0](https://doi.org/10.1016/S2213-2600(22)00483-0).

**Table: Ongoing intervention and observational studies in PARDS**

|                                                                             | Study type                                                    | Sample size                                                                                | Eligibility criteria                                                                                                                                                                                                                                                                        | Intervention or assessment                                                             | Key outcomes                                                                                                                                                                                                                                                                                                                    | Status                                                                   |
|-----------------------------------------------------------------------------|---------------------------------------------------------------|--------------------------------------------------------------------------------------------|---------------------------------------------------------------------------------------------------------------------------------------------------------------------------------------------------------------------------------------------------------------------------------------------|----------------------------------------------------------------------------------------|---------------------------------------------------------------------------------------------------------------------------------------------------------------------------------------------------------------------------------------------------------------------------------------------------------------------------------|--------------------------------------------------------------------------|
| Paediatric ARDS Neuromuscular Blockade Study (PAN; NCT02902055)             | Multicentre, double-blind, phase 4 RCT                        | 178                                                                                        | Age <5 years; need for mechanical ventilation with tidal volume 5–8 mL/kg ideal bodyweight and PEEP ≥5 cm H <sub>2</sub> O; early moderate-to-severe PARDS (OI ≥12 or OSI ≥9.09) originating from any cause; within 48 h of PICU admission                                                  | Continuous neuromuscular blockade (rocuronium 1 mg/kg per h) vs placebo for 48 h       | Cumulative respiratory morbidity score 1 year after PICU discharge                                                                                                                                                                                                                                                              | Recruiting (estimated study completion date: May 1, 2024)                |
| Real-Time Effort Driven Ventilator Management (REDvent; NCT03266016)        | Single-centre, single-blind, phase 2 RCT                      | 276                                                                                        | Age >1 month to ≤18 years; supported on mechanical ventilation with PARDS (pulmonary parenchymal disease; OI ≥4 or OSI ≥5); within 48 h of initiation of invasive mechanical ventilation                                                                                                    | Ventilator management using a CDS tool for lung and diaphragm protection vs usual care | Duration of weaning (up to 28 days)                                                                                                                                                                                                                                                                                             | Recruiting (estimated study completion date: June 30, 2023)              |
| Identifying PARDS Endotypes (NCT03539783)                                   | Single-centre case-control study                              | 60 (30 intubated patients with PARDS, 30 patients with non-lung injury-related conditions) | Age 1 month to 18 years; admitted to the PICU with expected duration of ≥7 days; PARDS group intubated with acute changes on chest x-ray, OI ≥4 or OSI ≥5, and known or suspected insult consistent with ARDS within 7 days; control group admitted with non-lung injury-related conditions | Bronchial epithelial cell brushing for gene-expression profiling                       | Identification of PARDS endotypes using unbiased cluster analysis of gene expression                                                                                                                                                                                                                                            | Recruiting (estimated study completion date: March 31, 2025)             |
| Long Term Follow up of Children Enrolled in the REDvent Study (NCT03709199) | Single-centre, prospective observational follow-up study      | 240                                                                                        | Enrolled in REDvent                                                                                                                                                                                                                                                                         | Ventilator management using a CDS tool for lung and diaphragm protection vs usual care | Ventilation inhomogeneity using lung clearance index with nitrogen washout 6 months after ICU discharge; neurocognitive function (Batelle-2 or WISC-5 cognitive tests) 3 months after ICU discharge; health-related quality of life (PedsQL) 3 months after ICU discharge; functional status scale 3 months after ICU discharge | Recruiting (estimated study completion date: March 1, 2024)              |
| Prone and Oscillation Pediatric Clinical Trial (PROspect; NCT03896763)      | Multicentre, open-label, 2x2 factorial, response-adaptive RCT | 800                                                                                        | Age 2 weeks to 20 years; intubated and mechanically ventilated with moderate-to-severe PARDS* for <48 h                                                                                                                                                                                     | CMV vs HFOV; prone vs supine positioning                                               | Ventilator-free days at day 28                                                                                                                                                                                                                                                                                                  | Enrolling by invitation (estimated study completion date: July 31, 2026) |

|                                                                                                                          |                                                                  |                                                |                                                                                                                                                                                                                                                |                                                                                                                      |                                                                                                                                                                                                                                                                     |                                                              |
|--------------------------------------------------------------------------------------------------------------------------|------------------------------------------------------------------|------------------------------------------------|------------------------------------------------------------------------------------------------------------------------------------------------------------------------------------------------------------------------------------------------|----------------------------------------------------------------------------------------------------------------------|---------------------------------------------------------------------------------------------------------------------------------------------------------------------------------------------------------------------------------------------------------------------|--------------------------------------------------------------|
| Clinical Decision Support Tool in PARDS Pilot Study (NCT04068012)                                                        | Multicentre observational study                                  | 180                                            | Age >1 month to ≤18 years; supported on mechanical ventilation with pulmonary parenchymal disease and OI ≥4 or OSI ≥5; within 72 h of initiation of invasive mechanical ventilation and expected to require >72 h mechanical ventilation       | Ventilator management using a CDS tool for lung and diaphragm protection and to guide liberation from the ventilator | Implementation feasibility; protocol adherence                                                                                                                                                                                                                      | Recruiting (estimated study completion date: June, 2023)     |
| Pediatric Acute Respiratory Distress Syndrome Asia Study (PARDSPROASIA; NCT04068038)                                     | Multicentre, prospective cohort study                            | 800                                            | Age ≤21 years; on ventilatory support for PARDS*                                                                                                                                                                                               | Screening of all PICU admissions and collection of epidemiological and clinical data                                 | Prevalence of PARDS; 60-day mortality; ventilator-free days at day 28;† ICU-free days at day 28;† requirement for ECMO†                                                                                                                                             | Recruiting (estimated study completion date: Aug 1, 2023)    |
| Linking Endotypes and Outcomes in Pediatric Acute Respiratory Distress Syndrome (LEOPARDS; NCT04113434)                  | Multicentre, prospective cohort study                            | 500                                            | Age 44 weeks to <17.5 years; admitted to PICU for acute (≤7 days of risk factor) respiratory failure requiring invasive mechanical ventilation; bilateral infiltrates on chest x-ray; OI ≥4 or OSI ≥5                                          | Assessment of plasma protein biomarkers and peripheral blood gene expression                                         | 28-day mortality; presence of two or more PARDS endotypes using a 100-gene-expression-based classifier; occurrence of de-novo PARDS subphenotypes using 12 protein biomarkers and whole-genome transcriptomics of peripheral blood; ventilator-free days at day 28† | Recruiting (estimated study completion date: December, 2024) |
| Infants With Severe Acute Respiratory Distress Syndrome: The Prone Trial (NCT05002478)                                   | Single-centre, open-label RCT                                    | 14                                             | Age >36 weeks to <24 months; intubated and mechanically ventilated for ≥6 h and expected to require invasive ventilatory support for ≥12 h; severe PARDS (OSI ≥12·3); clinical picture strongly suggestive of acute bronchiolitis or pneumonia | Prone vs supine positioning after surfactant administration                                                          | Change in OSI at 6 h; change in lung ultrasound at 6 h;† change in distribution of end-expiratory lung volume at 6 h;† change in distribution of tidal volume at 6 h†                                                                                               | Recruiting (estimated study completion date: Dec 31, 2024)   |
| Continuous Infusion Versus Intermittent Boluses of Cisatracurium in the Early Management of Pediatric ARDS (NCT05153525) | Single-centre, open-label, phase 4 RCT                           | 60                                             | Age 1 month to 18 years; within 48 h of PARDS diagnosis*                                                                                                                                                                                       | Intermittent boluses of cisatracurium vs intravenous infusion of cisatracurium for 24 h                              | Duration of mechanical ventilation (up to 10 days)                                                                                                                                                                                                                  | Recruiting (estimated study completion date: Aug 5, 2022)    |
| ARDS in Children and ECMO Initiation Strategies Impact on Neurodevelopment                                               | Multicentre, prospective cohort study (PROspect ancillary study) | 550 from the ELSO registry; 1000 from PROspect | ECMO group: moderate-to-severe PARDS;‡ intubated and on ECMO for <7 days; bilateral lung disease on chest x-ray                                                                                                                                | ECMO vs protocolised therapies (CMV vs HFOV; prone vs                                                                | Change in functional status scale 1 year after PICU discharge; change in health-related quality of life (PedsQL) 1 year after PICU discharge; proportion with a new morbidity at                                                                                    | Recruiting (estimated study completion date: June, 2026)     |

|                                                                                                                  |                                                            |     |                                                  |                                                                                                                                                                 |                                                                                                                                                                                                                                                                                                                        |                                                          |
|------------------------------------------------------------------------------------------------------------------|------------------------------------------------------------|-----|--------------------------------------------------|-----------------------------------------------------------------------------------------------------------------------------------------------------------------|------------------------------------------------------------------------------------------------------------------------------------------------------------------------------------------------------------------------------------------------------------------------------------------------------------------------|----------------------------------------------------------|
| (ASCEND;<br>NCT05388708)                                                                                         |                                                            |     | Protocolised therapy group: enrolled in PROSpect | supine positioning)                                                                                                                                             | 1 year after PICU discharge; all-cause mortality at hospital discharge or 90 days; change in paediatric overall performance category 1 year after PICU discharge;† change in paediatric cerebral performance category 1 year after PICU discharge†                                                                     |                                                          |
| Endotypes in Children with Severe Acute Respiratory Distress Syndrome: Impact on Response to Treatment (ENSNARE) | Multicentre observational study (PROSpect ancillary study) | 300 | Enrolled in PROSpect                             | Assessment of plasma protein biomarkers and whole-blood genome-wide gene expression; latent class analysis to relate expression profiles to treatment responses | Identification and characterisation of endotypes using latent class analysis and gene-expression profiling; assessment of differences in outcomes and responses to treatment between PARDS endotypes; identification of potential pathways involved in differences between endotype outcomes and response to treatment | Recruiting (estimated study completion date: June, 2026) |
| Microbiome and Nutrition in Severe PARDS Trial (MANTIS)                                                          | Multicentre observational study (PROSpect ancillary study) | 800 | Enrolled in PROSpect                             | Stool and endotracheal aspirate sampling for assessment of gut and lung microbiomes                                                                             | Relationship between early enteral nutrition exposure and butyrate-producing faecal bacteria, faecal butyrate, and patient outcomes; relationship between faecal short-chain fatty acids and lower respiratory tract inflammation, acute lung injury, and innate immune cell gene-expression patterns                  | Recruiting (estimated study completion date: June, 2026) |

ARDS=acute respiratory distress syndrome. CDS=computerised decision support. CMV=conventional mechanical ventilation. ECMO=extracorporeal membrane oxygenation. ELSO=Extracorporeal Life Support Organization. HFOV high-frequency oscillatory ventilation. ICU=intensive care unit. OI=oxygenation index. OSI=oxygen saturation index. PARDS=paediatric acute respiratory distress syndrome. PedsQL=Paediatric Quality of Life Inventory. PEEP=positive end-expiratory pressure. PICU=paediatric ICU. RCT=randomised controlled trial. WISC-5=Wechsler Intelligence Scale for Children—Fifth Edition. \*Defined by PALICC criteria. †Secondary outcomes. ‡Defined by OI or OSI criteria in patients with bilateral lung disease on chest x-ray (one OI  $\geq 16$  or two OIs  $\geq 12$  and  $\leq 16$  at least 4 h apart, or two OSIs  $\geq 10$  at least 4 h apart, or one OI  $\geq 12$  and  $\leq 16$  and one OSI  $\geq 10$  at least 4 h apart).
